# Supplementary material
Source: PubMed Central journal article supplement (PMC6763313)
Supplement: NIHMS1528117-supplement-5.pdf [file NIHMS1528117-supplement-5.pdf]

**Table S1. Results for statistical tests of all time series HDX/HRF-MS data, Related to Figures 2 and 3**

|                                 | Methodology                    | Statistical test employed      | Residue Numbers | $\alpha$ Test value | F statistic | P value significance | N        | Note   |  |
|---------------------------------|--------------------------------|--------------------------------|-----------------|---------------------|-------------|----------------------|----------|--------|--|
| Figure 2B                       | HDX 10 sec pulse               | rANOVA                         | 133-144         | p=.01               | 10.61       | p<0.0001             | 3        |        |  |
|                                 | HDX 10 sec pulse               | rANOVA                         | 223-240         | p=.01               | 54.85       | p<0.0001             | 3        |        |  |
| Figure 2C                       | HDX 10 sec pulse (A2A) at RT   | rANOVA                         | 46-59           | p=.01               | 38.26       | p<0.0001             | 4        |        |  |
|                                 | HDX 10 sec pulse (b2AR) at RT  | rANOVA                         | 46-59           | p=.01               | 54.02       | p<0.0001             | 4        |        |  |
|                                 | HDX 10 sec pulse (A2A) at RT   | rANOVA                         | 367-371         | p=.01               | 4.843       | p=0.0012             | 4        |        |  |
|                                 | HDX 10 sec pulse (b2AR) at RT  | rANOVA                         | 367-371         | p=.01               | 10.84       | p=0.0001             | 3        |        |  |
|                                 | HDX 100 sec pulse (A2A) at RT  | rANOVA                         | 372-381         | p=.01               | 12.58       | p<0.0001             | 6        |        |  |
|                                 | HDX 100 sec pulse (b2AR) at RT | rANOVA                         | 372-381         | p=.01               | 2.887       | p=0.0210             | 4        |        |  |
|                                 | HDX 10 sec pulse (A2A) at RT   | rANOVA                         | 382-390         | p=.01               | 24.09       | p<0.0001             | 5        |        |  |
|                                 | HDX 10 sec pulse (b2AR) at RT  | rANOVA                         | 382-390         | p=.01               | 83.52       | p<0.0001             | 4        |        |  |
|                                 | Figure 2D                      | HDX 10 sec pulse (A2A) on ice  | rANOVA          | 46-59               | p=.01       | 25.63                | p<0.0001 | 3      |  |
|                                 |                                | HDX 10 sec pulse (b2AR) on ice | rANOVA          | 46-59               | p=.01       | 34.77                | p<0.0001 | 3      |  |
| HDX 10 sec pulse (A2A) on ice   |                                | rANOVA                         | 367-371         | p=.01               | 19.39       | p=0.0004             | 3        |        |  |
| HDX 10 sec pulse (b2AR) on ice  |                                | rANOVA                         | 367-371         | p=.01               | 13.89       | p=0.0003             | 3        |        |  |
| HDX 100 sec pulse (A2A) on ice  |                                | rANOVA                         | 372-381         | p=.01               | 7.501       | p=0.0004             | 5        |        |  |
| HDX 100 sec pulse (b2AR) on ice |                                | rANOVA                         | 372-381         | p=.01               | 3.464       | p=0.0280             | 4        |        |  |
| HDX 10 sec pulse (A2A) on ice   |                                | rANOVA                         | 382-390         | p=.01               | 1.565       | p=0.2552             | 3        |        |  |
| HDX 10 sec pulse (b2AR) on ice  |                                | rANOVA                         | 382-390         | p=.01               | 4.445       | p=0.0216             | 3        |        |  |
| Figure S4A                      | HDX 100 sec pulse (A2A) at RT  | rANOVA                         | 46-59           | p=.01               | 54.63       | p<0.0001             | 6        |        |  |
|                                 | HDX 100 sec pulse (b2AR) at RT | rANOVA                         | 46-59           | p=.01               | 146.6       | p<0.0001             | 5        |        |  |
|                                 | HDX 100 sec pulse (A2A) at RT  | rANOVA                         | 367-371         | p=.01               | 16.65       | p<0.0001             | 6        |        |  |
|                                 | HDX 100 sec pulse (b2AR) at RT | rANOVA                         | 367-371         | p=.01               | 7.764       | p<0.0001             | 4        |        |  |
|                                 | HDX 100 sec pulse (A2A) at RT  | rANOVA                         | 382-390         | p=.01               | 42.17       | p<0.0001             | 6        |        |  |
|                                 | HDX 100 sec pulse (b2AR) at RT | rANOVA                         | 382-390         | p=.01               | 32.44       | p<0.0001             | 5        |        |  |
| Figure S4B                      | HDX 10 sec pulse (A2A) at RT   | rANOVA                         | 8-31            | p=.01               | 7.787       | p=0.0003             | 3        |        |  |
|                                 | HDX 10 sec pulse (b2AR) at RT  | rANOVA                         | 8-31            | p=.01               | 4.698       | p=0.0042             | 3        |        |  |
|                                 | HDX 100 sec pulse (A2A) at RT  | rANOVA                         | 8-31            | p=.01               | 11.32       | p<0.0001             | 5        |        |  |
|                                 | HDX 100 sec pulse (b2AR) at RT | rANOVA                         | 8-31            | p=.01               | 28.32       | p<0.0001             | 4        |        |  |
|                                 | HDX 10 sec pulse (A2A) on ice  | rANOVA                         | 8-31            | p=.01               | 0.3516      | p=0.8699             | 3        |        |  |
|                                 | HDX 10 sec pulse (b2AR) on ice | rANOVA                         | 8-31            | p=.01               | 0.9648      | p=0.4829             | 3        |        |  |
|                                 | HDX 10 sec pulse (A2A) at RT   | rANOVA                         | 256-272         | p=.01               | 17.14       | p<0.0001             | 5        |        |  |
|                                 | HDX 10 sec pulse (b2AR) at RT  | rANOVA                         | 256-272         |                     |             |                      |          | Note 1 |  |

|          |                                |        |         |       |        |          |   |        |
|----------|--------------------------------|--------|---------|-------|--------|----------|---|--------|
|          | HDX 100 sec pulse (A2A) at RT  | rANOVA | 256-272 | p=.01 | 15.97  | p<0.0001 | 5 |        |
|          | HDX 100 sec pulse (b2AR) at RT | rANOVA | 256-272 | p=.01 | 28.42  | p<0.0001 | 3 |        |
|          | HDX 10 sec pulse (A2A) on ice  | rANOVA | 256-272 | p=.01 | 3.835  | p=0.0336 | 3 |        |
|          | HDX 10 sec pulse (b2AR) on ice | rANOVA | 256-272 | p=.01 | 9.759  | p=0.0013 | 3 |        |
|          | HDX 10 sec pulse (A2A) at RT   | rANOVA | 297-315 | p=.01 | 8.252  | p<0.0001 | 5 |        |
|          | HDX 10 sec pulse (b2AR) at RT  | rANOVA | 297-315 | p=.01 | 15.08  | p<0.0001 | 4 |        |
|          | HDX 100 sec pulse (A2A) at RT  | rANOVA | 297-315 | p=.01 | 33.73  | p<0.0001 | 6 |        |
|          | HDX 100 sec pulse (b2AR) at RT | rANOVA | 297-315 | p=.01 | 90.68  | p<0.0001 | 5 |        |
|          | HDX 10 sec pulse (A2A) on ice  | rANOVA | 297-315 | p=.01 | 0.6923 | p=0.6409 | 3 |        |
|          | HDX 10 sec pulse (b2AR) on ice | rANOVA | 297-315 | p=.01 | 1.477  | p=0.2798 | 3 |        |
| Figure 3 | HRF                            | rANOVA | 130-140 | p=.01 | 5.69   | p<0.0001 | 4 |        |
|          | HRF                            | rANOVA | 217-222 | p=.01 | 2.93   | p=0.007  | 4 |        |
|          | HRF                            | rANOVA | 368-377 | p=.01 | 2.89   | p=0.008  | 4 |        |
|          | HRF                            | rANOVA | 381-394 | p=.05 | 1.7    | p=0.110  | 4 | Note 2 |

“Note 1” indicated in the Table: No data obtained.

“Note 2” indicated in the Table: While this time series does not meet the threshold of significance by rANOVA at  $\alpha=0.01$ , this is due to the surface exposed nature of this residue in the absence of being bound to the GPCR; this adds significantly to the experimental variability associated with this residue across the entire time series due to background oxidation. An unpaired t-test indicates that the observed differences between the 20 ms and 800 ms are significant to  $p=.03$ .
